# Supplementary material for: Evidences for a role of two Y-specific genes in sex determination in Populus deltoides
Source: PubMed Central journal article supplement (PMC7674411; doi:10.1038/s41467-020-19559-2), 2020-11-18
Supplement: 41467_2020_19559_MOESM1_ESM.pdf [file 41467_2020_19559_MOESM1_ESM.pdf]

**Evidences for a role of two Y-specific genes in sex determination in *Populus deltoides***

Xue *et al.*

### **Supplementary Method 1. Sequencing and assembly of *Populus deltoides* genomes**

For PacBio sequencing, high molecular weight DNA was extracted using the cetyltrimethylammonium bromide method<sup>1</sup>. g-TUBE (Covaris, USA) was used to shear DNAs of the female and male separately into fragments with an average size of 20 kb. The PacBio SMRT libraries were constructed using sheared DNAs, then sequenced following standard protocols (PacBio, USA). The initial assemblies of PacBio reads of the female were generated by using Wtdbg v2.5<sup>2</sup>, Falcon v0.3.0<sup>3</sup>, and Canu v1.8 softwares<sup>4</sup>. Quickmerge v0.2<sup>5</sup> was applied to combine the assemblies mainly based on Wtdbg assembly. The resulted sequences were further polished using Illumina genomic resequencing reads with Pilon v1.23 software<sup>6</sup>. Hi-C libraries were constructed for the female parent following the Proximo<sup>TM</sup> Hi-C plant protocol (Phase Genomics, USA) and applied for sequencing on an Illumina HiSeq X platform (Illumina, USA). The HindIII restriction enzyme was used for library construction and read pair filtering. Interactions were identified using HiC-Pro v2.10.0<sup>7</sup>. Uniquely mapped paired reads were screened using HiC-Pro's default parameters and grouped into several categories based on 1) distance between read ends, 2) mapping directions of read ends, and 3) distance of read ends to restriction enzyme sites. We excluded the following categories of interaction pairs 'dangling ends', 'self-circle ligation', 're-ligation', and 'dumped pairs (outside of the expected range)'. The remaining reads were considered 'valid' pairs and applied for genome scaffolding using Lachesis v20171221<sup>8</sup>. BUSCO v3.0.2<sup>9</sup> was used to evaluate the completeness of the genome assemblies (Supplementary Table 2) with plant conserved single-copy gene set. Default settings of the parameters were used for the software if not specified.

## Supplementary Method 2. Genome annotation

A *de novo* repeat library was constructed using LTR\_retriever v2.8.7<sup>10</sup>, RepeatScout v1.0.5<sup>11</sup>, and PILER-DF v2.4<sup>12</sup>. The resulted repeat elements were categorized using PASTEClassifier v1.0<sup>13</sup> and combined with Repbase<sup>14</sup>, which were further imported to RepeatMasker (version 4.07)<sup>15</sup> to identify and cluster repetitive elements. Sequences with more than ten monomers simple repeats ‘CCCTAAA’ were identified as telomeres.

Evidence of multiple resources was used to predict protein-coding genes in the genome. RNASeq data were mapped to the reference genome using HISAT2 v2.0.5<sup>16</sup> and assembled into transcripts using Stringtie v1.3.6.<sup>17</sup> The resulted transcripts were screened using TransDecoder v5.0.2<sup>18</sup> and GeneMarkS-T v5.1<sup>19</sup> for protein-coding genes. PASA v2.0.2<sup>20</sup> was used to predict gene structures of the transcripts. The *ab initio* prediction was performed using Genscan v1.0<sup>21</sup>, Augustus v3.2.3<sup>22</sup>, and SNAP v2013-11-29<sup>23</sup>. GeMoMa v1.5.3<sup>24</sup> was applied for homology-based predictions. All the annotations were integrated using EVM v1.1.1<sup>25</sup>. Infernal v1.1.2<sup>26</sup> was used to predict rRNAs using Rfam as reference. The tRNA genes were predicted using tRNAscan-SE v1.3.1<sup>27</sup>. Pseudogenes were predicted using GeneWise v2.4.1<sup>28</sup> after the filtering of protein-coding genes using GenBlastA v1.0.4<sup>29</sup>. The functions of genes were annotated through similarity search of databases including NR, KOG, KEGG, and TrEMBL. During genome annotation, default settings of software were applied expecting the limit of intron length if needed. The minimum and maximum of intron length were set as 20 bp and 10,000 bp respectively.

### **Supplementary Method 3. Constructing the SLR haplotypes**

To compare the sequences in SLR between the X and Y chromatids, we reconstructed the haplotypes of SLR-X and SLR-Y as follows: Canu software<sup>4</sup> was applied to assemble the PacBio reads of the sequenced male. The purge\_haplotigs tool v1.0.3<sup>30</sup> was used to screen primary contigs and allelic secondary contigs. With the sequenced female as reference, both the primary and the secondary contigs were mapped to the reference genome. The contigs located in SLR were assigned to X and Y haplotypes based on SNPs between contigs and the reference genome.

### **Supplementary Method 4. Quantitative analysis of Illumina reads**

Before applying to the corresponding analysis pipeline, low-quality Illumina reads were removed, and adaptor sequences were trimmed using Trimmonatic v0.36<sup>31</sup>. In data analysis of RNASeq, lncRNASeq, and sRNASeq, the rRNA/tRNA contaminants were also removed by mapping of the reads to rRNA/tRNA sequences from public databases. The rRNA sequences of all plant species were downloaded from SILVA rRNA database (<https://www.arb-silva.de>, release 104), and the tRNA sequences of *Arabidopsis thaliana* and *P. trichocarpa* were downloaded from tRNAdb (<http://trna.bioinf.uni-leipzig.de/DataOutput/>). STAR v2.5.3a<sup>32</sup> was used to map the RNASeq and lncRNASeq reads onto the reference with setting ‘--alignMatesGapMax 20000 --alignIntronMax 10000’, and DEseq2<sup>33</sup> was applied for differential expression analysis. The numbers of differentially expressed genes are shown in supplemental Table 7. Transcripts of lncRNA were assembled using Trinity V2.6.6<sup>19</sup> with the parameter settings for strand-specific reads (‘--SS\_lib\_type RF’). The obtained sequences were applied to search NR database. Small RNA reads and Bisulfite sequencing (BS-seq) reads were mapped

onto genome reference using Bowtie2 v2.3.4.1<sup>34</sup> and Bismark v0.16.3<sup>35</sup>, respectively. The alignment results were visualized using IGV v 2.4.14<sup>36</sup>.

#### **Supplementary Method 5. Assembly of *MSL* sequences for *Populus deltoides* population**

To further confirm the specificity of *MSL* locus, the raw reads mapping the *MSL* locus were extracted from the bam files of all female and male individuals in the GWAS population. Contigs of each individual plant were further assembled using Velvet v1.2.10<sup>37</sup> and aligned with *MSL* sequence from PacBio assembly. The alignment results were visualized in using R package genoPlot v0.8.9<sup>38</sup> and shown in supplementary Fig. 8a and 8b.

**Supplementary Table 1. Primers used in this study.**

| Primer        | Forward primer sequence                      | Reverse primer sequence                           | Application                 |
|---------------|----------------------------------------------|---------------------------------------------------|-----------------------------|
| N025          | CCCCCTTTAAATTTTACTGTAG                       | TTTTCTTGTTGAGTTGACGTT                             | Fine mapping                |
| N062          | TCCTGAATAGTACGCTACACA                        | ATTGATTGAAGGGCATAACATA                            | Fine mapping                |
| N084          | CTGCTACAACCTCCTCCAAATA                       | GTGACTCAGAAAACCCATAAAA                            | Fine mapping                |
| N110          | AAAGACATTCCCTTTCTTGTC                        | GGGTTGTTTCCTTTTCCTT                               | Fine mapping                |
| N126          | TTTTTCTCTCTCACAAATGGA                        | CATTGACTATAATGCGGGTAG                             | Fine mapping                |
| N194          | TACCTCTCGAGTTGAAACAGA                        | AATGCATGAGGCAATAGTTAC                             | Fine mapping                |
| N209          | ATTCCAACACCAACTAACTCA                        | GACCCTCATTGTCATGGAT                               | Fine mapping                |
| N362          | TACATTGAATCAGCTCCAAAC                        | ATTCAAAGTTCAGGGATGAAA                             | Fine mapping                |
| N283          | ATCATCTGTTTTTACGGTTCA                        | TTAATAGGGAGTTGGAGGAAG                             | Fine mapping                |
| N293          | ATCCAAGTCCATTTTTCTTTC                        | CCTGTCTTTCTTTTCGTTTGT                             | Fine mapping                |
| F_841         | ATAAATCCTTACGACCCGAG                         | GCCAGATCTAACTCACGCAGG                             | Clone of SLR                |
| F_815         | AACGAGTGCTTGAGTCAGAAA                        | AGGAGAGAGAAAAGGGTGGCTA                            | Clone of SLR                |
| F_817         | CCACCGACAAGAGACAAAGAA                        | TGTCTGAACAAAACGCCATTAC                            | Clone of SLR                |
| F_821         | TGTTGATACGGATGACCACCT                        | CGGGATAACCCAATAAAAAGTA                            | Clone of SLR                |
| F_651         | AGAACTATCTCCTCCCCTGCG                        | CCGTGTGTTGCTGTGTGGAG                              | Clone of SLR                |
| F_709         | ATTGCTGATCTTTTCGGTCTTT                       | AAATCACTTTTGTGAATTCAGC                            | Clone of SLR                |
| F_655         | GAGAGTCTGGTACAGTATGCTGT                      | AACCACAAGTCGTTCAAGTATC                            | Clone of SLR                |
| F_710         | GTATGACAATCCCTCTCTCCA                        | ATTTCTATTAGAGAGGCCACG                             | Clone of SLR                |
| F_657         | TGTTGTGTCGCTTATGACCAC                        | CTGGCGGTTATGTGAGTATTG                             | Clone of SLR                |
| F_661         | CCACACAATACTCACATAACCGC                      | TTAGCAATTATCTCCGCCTCAT                            | Clone of SLR                |
| F_712         | AAAGAATGCCCAAGGAGAAC                         | TACTTGTGTTGAGAAGAGGGGG                            | Clone of SLR                |
| F_823         | GCTGAAGCGTGACTCGATCAG                        | AAAGACTTCATCTCGCACACTTG                           | Clone of SLR                |
| F_827         | AGAAAGACGCATAACAACGGTG                       | GAACTGTGAGCGTCGTGTGAA                             | Clone of SLR                |
| F_830         | AGGACATCTAAACTCCCAGCT                        | TTCTTGTAGCCATCAATCTGC                             | Clone of SLR                |
| F_833         | AGAGAGCCAGTTTTTTACGAAT                       | CAGAAAGATAAGGAGCAACAAC                            | Clone of SLR                |
| FERR          | GTGTTTTGTTGAGGAGATTAGAC                      | CCCTTCTTGTCTCTCTTTCTG                             | Clone of <i>FERR</i>        |
| MSL           | TTATTGTAGAAATAAGGCCTATATTCG                  | AAATTTATTTATAACGATCATTATCTCTCT                    | Clone of <i>MSL</i>         |
| P801          | GTTGAGAGGTATGTGGTAGTGC                       | GTGTTTTCTCTACCACCACCTC                            | qPCR ( <i>MET</i> )         |
| P806          | GAGAGAACCAGACAAATGCGG                        | CATCCCAATTTTCTTAACCTC                             | qPCR ( <i>TCP</i> )         |
| P977          | TTGCTATCCCATCTGGACTTT                        | CTTGTTGAAGTTATCAGCCACG                            | qPCR ( <i>CLC</i> )         |
| P809          | AAACGAAAGAGAGCATTGGA                         | TCATAACCTGTCATTCTGGCA                             | qPCR ( <i>FERR</i> )        |
| P982          | TCCTTGGTGTCTGAAAGTGTC                        | GGGAACCTTTGAAAAGTTGAA                             | qPCR ( <i>MSL</i> )         |
| P990          | AAGTAGCAATAGAGGTGGCGA                        | CTCTAACCCAACAGCACATCTT                            | qPCR ( <i>FERR-R</i> )      |
| PtUBQ         | GTTGATTTTTGCTGGGAAGC                         | GATCTTGGCCTTCACGTTGT                              | ubiquitin                   |
| FERR-infusion | GACTCTAGAGGATCCATGGCCAGCTCTTCTTCTCC          | GGAAATTCGAGCTCGGTACCTTATGCATGTTCTCTCTCTGCAA       | <i>FERR</i> _p2301-35S plus |
| MSL-infusion  | GGGACTCTAGAGGATCCTTATTGTAGAAATAAGGCCTATATTCG | GAAATTCGAGCTCGGTACCAAATTTATTTATAACGATCATTATCTCTCT | <i>MSL</i> _p2301-35S plus  |

**Supplementary Table 2. Genes annotated on SLR-X and SLR-Y, showing genes whose annotation suggests that they are XY pairs of genes.**

| X haplotype        |       |       |                   |            |                                                | Y haplotype     |        |                   |               |                                           |
|--------------------|-------|-------|-------------------|------------|------------------------------------------------|-----------------|--------|-------------------|---------------|-------------------------------------------|
| Pairs <sup>a</sup> | Start | End   | Dire <sup>b</sup> | Gene ID    | Annotation                                     | Start           | End    | Dire <sup>b</sup> | Gene ID       | Annotation                                |
| 1                  | 6516  | 10142 | -                 | EVM0038001 | Putative ribonuclease H protein At1g65750      | 24808           | 28035  | -                 | EVM0039001    | Putative ribonuclease H protein At1g65750 |
|                    |       |       |                   |            |                                                | 28452           | 29411  | -                 | EVM0039002    | None                                      |
|                    |       |       |                   |            |                                                | 34621           | 42229  | -                 | EVM0039003    | Putative ribonuclease H protein At1g65750 |
|                    | 10186 | 11322 | -                 | EVM0038002 | None                                           | 43815           | 49568  | -                 | EVM0039004    | None                                      |
|                    |       |       |                   |            |                                                | 50846           | 53313  | -                 | EVM0039005    | <i>MSL</i>                                |
|                    | 13949 | 20791 | -                 | EVM0038003 | Membrane protein of ER body-like protein       | ABSENT FROM Y 1 |        |                   |               |                                           |
|                    | 20888 | 41226 | +                 | EVM0038004 | Adenosine deaminase-like protein               | ABSENT FROM Y 2 |        |                   |               |                                           |
|                    | 42680 | 43414 | -                 | EVM0038005 | None                                           | ABSENT FROM Y 3 |        |                   |               |                                           |
|                    | 43502 | 44999 | -                 | EVM0038006 | Probable serine/threonine-protein kinase PBL23 | ABSENT FROM Y 4 |        |                   |               |                                           |
|                    |       |       |                   |            |                                                | ABSENT FROM X 1 |        |                   |               |                                           |
| 61451              |       |       |                   |            |                                                | 77472           | -      | EVM0039006        | <i>FERR-R</i> |                                           |
| ABSENT FROM X 2    |       |       |                   |            |                                                |                 |        |                   |               |                                           |
| 2                  | 47938 | 51624 | +                 | EVM0038007 | T-complex protein 1 subunit gamma(TCP)         | 81909           | 82697  | +                 | EVM0039007    | None                                      |
|                    |       |       |                   |            |                                                | 87483           | 94421  | +                 | EVM0039008    | T-complex protein 1 subunit gamma (TCP)   |
| 3                  | 69860 | 73840 | +                 | EVM0038008 | Chloride channel protein CLC-c(CLC)            | 97911           | 101936 | +                 | EVM0039009    | Chloride channel protein CLC-c (CLC)      |
|                    |       |       |                   |            |                                                | ABSENT FROM X 3 |        |                   |               |                                           |
| 4                  | 80892 | 90908 | +                 | EVM0038009 | DNA (cytosine-5)-methyltransferase 1           | 102582          | 105723 | +                 | EVM0039010    | Transposon                                |
|                    |       |       |                   |            |                                                | 114011          | 123903 | +                 | EVM0039011    | DNA (cytosine-5)-methyltransferase 1      |
| 5                  | 96020 | 99449 | +                 | EVM0038010 | Probable disease resistance protein At1g15890  | ABSENT FROM Y 5 |        |                   |               |                                           |
|                    |       |       |                   |            |                                                | 100609          | 103386 | +                 | EVM0038011    | Calcium-dependent protein kinase 4        |

|    |        |        |   |            |                                                            |        |        |   |            |                                                            |  |  |  |
|----|--------|--------|---|------------|------------------------------------------------------------|--------|--------|---|------------|------------------------------------------------------------|--|--|--|
|    | 105755 | 106240 | - | EVM0038012 | None                                                       |        |        |   |            |                                                            |  |  |  |
|    | 109496 | 110467 | + | EVM0038013 | None                                                       |        |        |   |            |                                                            |  |  |  |
|    | 113188 | 113559 | + | EVM0038014 | None                                                       |        |        |   |            |                                                            |  |  |  |
|    |        |        |   |            |                                                            | 138996 | 139496 | - | EVM0039013 | None                                                       |  |  |  |
|    |        |        |   |            |                                                            | 146409 | 146780 | + | EVM0039014 | None                                                       |  |  |  |
| 6  | 113610 | 113873 | + | EVM0038015 | E3 ubiquitin-protein<br>ligase makorin                     | 146831 | 147094 | + | EVM0039015 | E3 ubiquitin-protein<br>ligase makorin                     |  |  |  |
|    | 115866 | 116422 | - | EVM0038016 | None                                                       |        |        |   |            |                                                            |  |  |  |
|    | 116471 | 118068 | - | EVM0038017 | None                                                       |        |        |   |            |                                                            |  |  |  |
| 7  | 118349 | 126441 | + | EVM0038018 | Cleft lip and palate<br>transmembrane<br>protein 1 homolog | 147865 | 155841 | + | EVM0039016 | Cleft lip and palate<br>transmembrane<br>protein 1 homolog |  |  |  |
| 8  | 128479 | 133608 | - | EVM0038019 | Protein<br>SUPPRESSOR OF<br>GENE SILENCING 3               | 157892 | 163032 | - | EVM0039017 | Protein<br>SUPPRESSOR OF<br>GENE SILENCING<br>3            |  |  |  |
| 9  | 136821 | 139171 | - | EVM0038020 | None                                                       | 167821 | 168045 | - | EVM0039018 | None                                                       |  |  |  |
| 10 | 142264 | 143104 | + | EVM0038021 | PHD finger protein<br>At1g33420                            | 172166 | 177190 | + | EVM0039019 | PHD finger protein<br>At1g33420                            |  |  |  |
|    | 143296 | 144731 | + | EVM0038022 | None                                                       |        |        |   |            |                                                            |  |  |  |
|    | 145597 | 145828 | - | EVM0038023 | None                                                       |        |        |   |            |                                                            |  |  |  |
|    | 146378 | 146602 | - | EVM0038024 | None                                                       |        |        |   |            |                                                            |  |  |  |
|    | 150695 | 155648 | + | EVM0038025 | PHD finger protein<br>At1g33420                            |        |        |   |            |                                                            |  |  |  |
| 11 | 156184 | 159201 | + | EVM0038026 | Peroxidase 47                                              | 177652 | 180652 | + | EVM0039020 | Peroxidase 47                                              |  |  |  |
| 12 | 161059 | 164210 | - | EVM0038027 | 4,5-DOPA<br>dioxygenase extradiol                          | 182505 | 185706 | - | EVM0039021 | 4,5-DOPA<br>dioxygenase<br>extradiol                       |  |  |  |
| 13 | 166480 | 180086 | - | EVM0038028 | Probable disease<br>resistance protein<br>At4g27220        | 188011 | 190086 | - | EVM0039022 | Probable disease<br>resistance protein<br>At4g27220        |  |  |  |
|    | 185375 | 185461 | + | EVM0038029 | None                                                       |        |        |   |            |                                                            |  |  |  |
|    | 185494 | 186861 | - | EVM0038030 | None                                                       |        |        |   |            |                                                            |  |  |  |



|    |        |        |   |            |                                                                        |                    |        |        |   |            |                                     |                    |  |  |                 |
|----|--------|--------|---|------------|------------------------------------------------------------------------|--------------------|--------|--------|---|------------|-------------------------------------|--------------------|--|--|-----------------|
|    | 188133 | 190558 | - | EVM0038031 | Probable<br>receptor-like<br>serine/threonine-<br>protein<br>At1g07650 | LRR<br>kinase      |        |        |   |            |                                     |                    |  |  | ABSENT FROM Y 6 |
|    | 190717 | 194232 | - | EVM0038032 | Putative<br>resistance<br>RGA4                                         | disease<br>protein |        |        |   |            |                                     |                    |  |  | ABSENT FROM Y 7 |
|    | 198390 | 201014 | + | EVM0038033 | None                                                                   |                    |        |        |   |            |                                     |                    |  |  |                 |
|    | 201032 | 201112 | - | EVM0038034 | None                                                                   |                    |        |        |   |            |                                     |                    |  |  |                 |
|    | 201595 | 204301 | - | EVM0038035 | None                                                                   |                    |        |        |   |            |                                     |                    |  |  |                 |
|    | 205006 | 206255 | - | EVM0038036 | None                                                                   |                    |        |        |   |            |                                     |                    |  |  |                 |
| 14 | 209242 | 212680 | - | EVM0038037 | Probable<br>resistance<br>At4g27220                                    | disease<br>protein | 197721 | 202988 | - | EVM0039023 | Probable<br>resistance<br>At4g27220 | disease<br>protein |  |  |                 |
|    | 218494 | 219026 | - | EVM0038038 | Probable<br>receptor-like<br>serine/threonine-<br>protein<br>At1g07650 | LRR<br>kinase      |        |        |   |            |                                     |                    |  |  | ABSENT FROM Y 8 |
| 15 | 225393 | 229630 | - | EVM0038039 | Probable<br>resistance<br>At4g27220                                    | disease<br>protein | 214009 | 218246 | - | EVM0039024 | Probable<br>resistance<br>At4g27220 | disease<br>protein |  |  |                 |
|    | 230086 | 231963 | - | EVM0038040 | None                                                                   |                    | 220236 | 227934 | - | EVM0039025 | None                                |                    |  |  |                 |
| 16 | 241933 | 245026 | + | EVM0038041 | Probable<br>resistance<br>At5g43730                                    | disease<br>protein | 238511 | 241603 | + | EVM0039026 | Probable<br>resistance<br>At5g43730 | disease<br>protein |  |  |                 |

<sup>a</sup> XY gene pairs

<sup>b</sup> Direction

**Supplementary Table 3. Genome resequencing statistics of the female and male *P. deltoides*.**

| Sample ID | Sex    | Read Base      | Read Number | Coverage |
|-----------|--------|----------------|-------------|----------|
| 36-1      | Female | 11,649,192,900 | 38,830,643  | 27.09    |
| 40-1      | Female | 11,168,084,700 | 37,226,949  | 25.97    |
| 42-4      | Female | 12,287,930,700 | 40,959,769  | 28.58    |
| 47-4      | Female | 12,636,568,200 | 42,121,894  | 29.39    |
| 48-5      | Female | 11,102,390,400 | 37,007,968  | 25.82    |
| 50-5      | Female | 14,602,650,900 | 48,675,503  | 33.96    |
| 52-1      | Female | 11,245,898,400 | 37,486,328  | 26.15    |
| 60-8      | Female | 13,177,485,900 | 43,924,953  | 30.65    |
| 63-1      | Female | 11,296,434,900 | 37,654,783  | 26.27    |
| 66-5      | Female | 11,477,944,500 | 38,259,815  | 26.69    |
| 70-5      | Female | 10,964,830,500 | 36,549,435  | 25.50    |
| 72-6      | Female | 11,179,380,300 | 37,264,601  | 26.00    |
| 74-4      | Female | 11,733,299,700 | 39,110,999  | 27.29    |
| 77-1      | Female | 10,556,599,800 | 35,188,666  | 24.55    |
| 78-4      | Female | 11,534,989,800 | 38,449,966  | 26.83    |
| 80-4      | Female | 11,815,474,500 | 39,384,915  | 27.48    |
| 83-3      | Female | 14,071,658,400 | 46,905,528  | 32.72    |
| 87-6      | Female | 10,132,395,000 | 33,774,650  | 23.56    |
| 88-2      | Female | 11,882,076,600 | 39,606,922  | 27.63    |
| 90-5      | Female | 13,220,877,300 | 44,069,591  | 30.75    |
| 92-7      | Female | 9,888,900,000  | 32,963,000  | 23.00    |
| 93-1      | Female | 11,695,936,500 | 38,986,455  | 27.20    |
| 96-7      | Female | 11,972,586,300 | 39,908,621  | 27.84    |
| 97-3      | Female | 11,297,386,500 | 37,657,955  | 26.27    |
| 98-5      | Female | 15,165,401,700 | 50,551,339  | 35.27    |
| 22-1      | Female | 12,758,267,700 | 42,527,559  | 29.67    |
| 24-1      | Female | 11,006,373,300 | 36,687,911  | 25.60    |
| 31-1      | Female | 11,898,806,700 | 39,662,689  | 27.67    |
| 28-3      | Female | 11,370,264,300 | 37,900,881  | 26.44    |
| 7-3       | Female | 11,660,032,200 | 38,866,774  | 27.12    |
| 11-1      | Female | 11,459,820,900 | 38,199,403  | 26.65    |
| 100-2     | Female | 12,408,186,000 | 41,360,620  | 28.86    |
| 101-5     | Female | 11,580,759,900 | 38,602,533  | 26.93    |
| 102-3     | Female | 11,684,571,900 | 38,948,573  | 27.17    |
| 103-3     | Female | 11,444,420,700 | 38,148,069  | 26.61    |
| 104-1     | Female | 11,093,350,500 | 36,977,835  | 25.80    |
| 61-18     | Female | 12,642,730,800 | 42,142,436  | 29.40    |
| S3230     | Female | 14,264,241,300 | 47,547,471  | 33.17    |
| 81-22     | Female | 11,090,319,000 | 36,967,730  | 25.79    |

|       |        |                |            |       |
|-------|--------|----------------|------------|-------|
| 86-13 | Female | 11,822,777,400 | 39,409,258 | 27.49 |
| 89-18 | Female | 11,622,264,300 | 38,740,881 | 27.03 |
| 94-27 | Female | 11,794,462,200 | 39,314,874 | 27.43 |
| 95-30 | Female | 11,465,142,300 | 38,217,141 | 26.66 |
| S3016 | Female | 12,946,626,300 | 43,155,421 | 30.11 |
| S3109 | Female | 12,148,255,800 | 40,494,186 | 28.25 |
| S3229 | Female | 13,144,587,900 | 43,815,293 | 30.57 |
| S3107 | Female | 12,787,382,100 | 42,624,607 | 29.74 |
| S3700 | Female | 15,085,499,100 | 50,284,997 | 35.08 |
| S3406 | Female | 11,765,872,500 | 39,219,575 | 27.36 |
| 31-4  | Male   | 12,545,672,100 | 41,818,907 | 29.18 |
| 35-2  | Male   | 11,043,030,000 | 36,810,100 | 25.68 |
| 36-3  | Male   | 11,442,942,900 | 38,143,143 | 26.61 |
| 45-1  | Male   | 13,935,390,600 | 46,451,302 | 32.41 |
| 47-2  | Male   | 11,552,744,700 | 38,509,149 | 26.87 |
| 48-1  | Male   | 11,386,119,000 | 37,953,730 | 26.48 |
| 51-1  | Male   | 12,487,357,200 | 41,624,524 | 29.04 |
| 60-2  | Male   | 11,990,539,200 | 39,968,464 | 27.88 |
| 62-3  | Male   | 11,821,741,500 | 39,405,805 | 27.49 |
| 63-5  | Male   | 11,965,007,100 | 39,883,357 | 27.83 |
| 70-1  | Male   | 11,459,258,100 | 38,197,527 | 26.65 |
| 72-2  | Male   | 12,000,861,900 | 40,002,873 | 27.91 |
| 74-1  | Male   | 14,045,237,100 | 46,817,457 | 32.66 |
| 77-10 | Male   | 11,668,235,700 | 38,894,119 | 27.14 |
| 78-2  | Male   | 11,339,813,400 | 37,799,378 | 26.37 |
| 86-6  | Male   | 11,183,043,900 | 37,276,813 | 26.01 |
| 87-5  | Male   | 11,769,492,300 | 39,231,641 | 27.37 |
| 88-7  | Male   | 11,964,074,100 | 39,880,247 | 27.82 |
| 93-4  | Male   | 11,028,985,200 | 36,763,284 | 25.65 |
| 95-12 | Male   | 11,846,649,600 | 39,488,832 | 27.55 |
| 96-10 | Male   | 13,193,655,900 | 43,978,853 | 30.68 |
| 28-2  | Male   | 12,408,126,600 | 41,360,422 | 28.86 |
| 24-3  | Male   | 11,172,411,300 | 37,241,371 | 25.98 |
| 22-4  | Male   | 11,966,299,200 | 39,887,664 | 27.83 |
| 100-4 | Male   | 11,177,231,400 | 37,257,438 | 25.99 |
| 101-3 | Male   | 10,894,545,900 | 36,315,153 | 25.34 |
| 102-9 | Male   | 11,939,396,100 | 39,797,987 | 27.77 |
| 103-9 | Male   | 11,884,926,600 | 39,616,422 | 27.64 |
| 104-2 | Male   | 12,839,783,400 | 42,799,278 | 29.86 |
| 131-3 | Male   | 13,945,134,900 | 46,483,783 | 32.43 |
| S3301 | Male   | 11,829,934,500 | 39,433,115 | 27.51 |
| 65-18 | Male   | 11,610,252,900 | 38,700,843 | 27.00 |
| 66-16 | Male   | 11,715,514,500 | 39,051,715 | 27.25 |

|       |      |                |            |       |
|-------|------|----------------|------------|-------|
| 81-30 | Male | 11,411,807,700 | 38,039,359 | 26.54 |
| 89-28 | Male | 11,875,062,600 | 39,583,542 | 27.62 |
| 94-28 | Male | 11,835,697,200 | 39,452,324 | 27.52 |
| S3101 | Male | 13,373,461,500 | 44,578,205 | 31.10 |
| S3201 | Male | 14,262,937,800 | 47,543,126 | 33.17 |
| S3244 | Male | 11,973,510,900 | 39,911,703 | 27.85 |
| S3261 | Male | 13,581,076,200 | 45,270,254 | 31.58 |
| S3415 | Male | 11,210,397,600 | 37,367,992 | 26.07 |
| S3702 | Male | 14,024,592,000 | 46,748,640 | 32.62 |
| S3804 | Male | 13,570,024,800 | 45,233,416 | 31.56 |
| S3236 | Male | 11,486,967,600 | 38,289,892 | 26.71 |
| S3239 | Male | 14,794,821,300 | 49,316,071 | 34.41 |
| S3240 | Male | 13,313,584,500 | 44,378,615 | 30.96 |

---

**Supplementary Table 4. Summary of genome regions containing SNPs with fully sex-linked genotype configurations.**

| Chromosome         | Start of region | End of region | Number SNPs. | of | Number of genes |
|--------------------|-----------------|---------------|--------------|----|-----------------|
| XIX SLR of XY pair | 120,289         | 161,988       | 315          |    | 3               |
| XIX PAR of XY pair | 17,899,199      | 17,909,028    | 78           |    | 1 (FERR)        |
| IX (autosome)      | 7,729,222       | 7,730,262     | 27           |    | 1 (HEMA1)       |
| I                  | 50,047,869      | 50,053,274    | 5            |    | 2               |
| XVIII              | 4,573,272       | 4,573,288     | 2            |    | 1               |
| I                  | 22,376,091      | —             | 1            |    | 0               |
| Contig01665        | 13,437          | 16,183        | 7            |    | 2               |
| Total              | 435             | 10            |              |    |                 |

**Supplementary Table 5. Sequence homology analysis for sequence containing SEMSs.**

| Location of SEMSs | Length of query sequence | Hit start in the YHS | Hit end in the YHS | Identity (%) | E Value   |
|-------------------|--------------------------|----------------------|--------------------|--------------|-----------|
| PAR               | 10,030                   | 61,590               | 61,418             | 92.49        | 6.42E-63  |
| PAR               | 10,030                   | 61,683               | 61,588             | 93.75        | 8.67E-32  |
| PAR               | 10,030                   | 61,767               | 63,351             | 87.59        | 0         |
| PAR               | 10,030                   | 66,854               | 63,357             | 88.95        | 0         |
| PAR               | 10,030                   | 66,965               | 67,466             | 88.76        | 7.11E-172 |
| PAR               | 10,030                   | 67,601               | 68,223             | 90.21        | 0         |
| PAR               | 10,030                   | 68,416               | 69,127             | 92.61        | 0         |
| PAR               | 10,030                   | 68,460               | 66,820             | 85.42        | 0         |
| PAR               | 10,030                   | 69,398               | 69,226             | 93.06        | 1.38E-64  |
| PAR               | 10,030                   | 69,425               | 73,224             | 88.61        | 0         |
| PAR               | 10,030                   | 74,662               | 74,993             | 94.29        | 2.67E-141 |
| PAR               | 10,030                   | 78,458               | 75,021             | 89.37        | 0         |
| PAR               | 10,030                   | 78,712               | 79,523             | 92.16        | 0         |
| PAR               | 10,030                   | 79,516               | 80,026             | 92.25        | 0         |
| Chr_I             | 5,606                    | 49,675               | 47,836             | 89.24        | 0         |
| Chr_I             | 5,606                    | 49,856               | 49,671             | 89.25        | 1.00E-58  |
| Chr_I             | 201                      | 53,477               | 53,286             | 89.45        | 1.45E-63  |
| Chr_IX            | 1,241                    | 73,287               | 74,402             | 89.26        | 0         |
| Chr_XVIII         | 217                      | 104,531              | 104,747            | 91.71        | 9.29E-81  |
| Contig01665       | 2,947                    | 106,608              | 103,675            | 93.49        | 0         |

**Supplementary Table 6. List of samples used for sequencing in this study.**

| Sample                 | Tissue              | Library_ID              | Application |
|------------------------|---------------------|-------------------------|-------------|
| <i>P. deltooides</i> ♀ | Flower bud          | T2 (June 18)_bud_1_F    | lncRNA-seq  |
| <i>P. deltooides</i> ♀ | Flower bud          | T2 (June 18)_bud_2_F    | lncRNA-seq  |
| <i>P. deltooides</i> ♀ | Flower bud          | T2 (June 18)_bud_3_F    | lncRNA-seq  |
| <i>P. deltooides</i> ♀ | Flower bud          | T3 (July 3)_bud_1_F     | lncRNA-seq  |
| <i>P. deltooides</i> ♀ | Flower bud          | T3 (July 3)_bud_2_F     | lncRNA-seq  |
| <i>P. deltooides</i> ♀ | Flower bud          | T3 (July 3)_bud_3_F     | lncRNA-seq  |
| <i>P. deltooides</i> ♀ | Flower bud          | T4 (July 18)_bud_1_F    | lncRNA-seq  |
| <i>P. deltooides</i> ♀ | Flower bud          | T4 (July 18)_bud_2_F    | lncRNA-seq  |
| <i>P. deltooides</i> ♀ | Flower bud          | T4 (July 18)_bud_3_F    | lncRNA-seq  |
| <i>P. deltooides</i> ♀ | Descaled flower bud | T5 (August 3)_bud_1_F   | lncRNA-seq  |
| <i>P. deltooides</i> ♀ | Descaled flower bud | T5 (August 3)_bud_2_F   | lncRNA-seq  |
| <i>P. deltooides</i> ♀ | Descaled flower bud | T5 (August 3)_bud_3_F   | lncRNA-seq  |
| <i>P. deltooides</i> ♀ | Descaled flower bud | T8 (December 1)_bud_1_F | lncRNA-seq  |
| <i>P. deltooides</i> ♀ | Descaled flower bud | T8 (December 1)_bud_2_F | lncRNA-seq  |
| <i>P. deltooides</i> ♀ | Descaled flower bud | T8 (December 1)_bud_3_F | lncRNA-seq  |
| <i>P. deltooides</i> ♂ | Flower bud          | T2 (June 18)_bud_1_M    | lncRNA-seq  |
| <i>P. deltooides</i> ♂ | Flower bud          | T2 (June 18)_bud_2_M    | lncRNA-seq  |
| <i>P. deltooides</i> ♂ | Flower bud          | T2 (June 18)_bud_3_M    | lncRNA-seq  |
| <i>P. deltooides</i> ♂ | Flower bud          | T3 (July 3)_bud_1_M     | lncRNA-seq  |
| <i>P. deltooides</i> ♂ | Flower bud          | T3 (July 3)_bud_2_M     | lncRNA-seq  |
| <i>P. deltooides</i> ♂ | Flower bud          | T3 (July 3)_bud_3_M     | lncRNA-seq  |
| <i>P. deltooides</i> ♂ | Flower bud          | T4 (July 18)_bud_1_M    | lncRNA-seq  |
| <i>P. deltooides</i> ♂ | Flower bud          | T4 (July 18)_bud_2_M    | lncRNA-seq  |
| <i>P. deltooides</i> ♂ | Flower bud          | T4 (July 18)_bud_3_M    | lncRNA-seq  |
| <i>P. deltooides</i> ♂ | Descaled flower bud | T5 (August 3)_bud_1_M   | lncRNA-seq  |
| <i>P. deltooides</i> ♂ | Descaled flower bud | T5 (August 3)_bud_2_M   | lncRNA-seq  |
| <i>P. deltooides</i> ♂ | Descaled flower bud | T5 (August 3)_bud_3_M   | lncRNA-seq  |
| <i>P. deltooides</i> ♂ | Descaled flower bud | T8 (December 1)_bud_1_M | lncRNA-seq  |
| <i>P. deltooides</i> ♂ | Descaled flower bud | T8 (December 1)_bud_2_M | lncRNA-seq  |
| <i>P. deltooides</i> ♂ | Descaled flower bud | T8 (December 1)_bud_3_M | lncRNA-seq  |
| <i>P. deltooides</i> ♀ | Flower bud          | T2 (June 18)_bud_1_F    | small RNA   |
| <i>P. deltooides</i> ♀ | Flower bud          | T2 (June 18)_bud_2_F    | small RNA   |
| <i>P. deltooides</i> ♀ | Flower bud          | T2 (June 18)_bud_3_F    | small RNA   |
| <i>P. deltooides</i> ♀ | Descaled flower bud | T8 (December 1)_bud_1_F | small RNA   |
| <i>P. deltooides</i> ♀ | Descaled flower bud | T8 (December 1)_bud_2_F | small RNA   |
| <i>P. deltooides</i> ♀ | Descaled flower bud | T8 (December 1)_bud_3_F | small RNA   |
| <i>P. deltooides</i> ♀ | Descaled flower bud | T9 (January 15)_bud_1_F | small RNA   |
| <i>P. deltooides</i> ♀ | Descaled flower bud | T9 (January 15)_bud_2_F | small RNA   |
| <i>P. deltooides</i> ♀ | Descaled flower bud | T9 (January 15)_bud_3_F | small RNA   |
| <i>P. deltooides</i> ♂ | Flower bud          | T2 (June 18)_bud_1_M    | small RNA   |

|                       |                     |                         |                 |
|-----------------------|---------------------|-------------------------|-----------------|
| <i>P. deltoides</i> ♂ | Flower bud          | T2 (June 18)_bud_2_M    | small RNA       |
| <i>P. deltoides</i> ♂ | Flower bud          | T2 (June 18)_bud_3_M    | small RNA       |
| <i>P. deltoides</i> ♂ | Descaled flower bud | T8 (December 1)_bud_1_M | small RNA       |
| <i>P. deltoides</i> ♂ | Descaled flower bud | T8 (December 1)_bud_2_M | small RNA       |
| <i>P. deltoides</i> ♂ | Descaled flower bud | T8 (December 1)_bud_3_M | small RNA       |
| <i>P. deltoides</i> ♂ | Descaled flower bud | T9 (January 15)_bud_1_M | small RNA       |
| <i>P. deltoides</i> ♂ | Descaled flower bud | T9 (January 15)_bud_2_M | small RNA       |
| <i>P. deltoides</i> ♂ | Descaled flower bud | T9 (January 15)_bud_3_M | small RNA       |
| <i>P. deltoides</i> ♀ | Flower bud          | T3 (July 3)_bud_1_F     | DNA methylation |
| <i>P. deltoides</i> ♀ | Flower bud          | T3 (July 3)_bud_2_F     | DNA methylation |
| <i>P. deltoides</i> ♀ | Flower bud          | T3 (July 3)_bud_3_F     | DNA methylation |
| <i>P. deltoides</i> ♀ | Descaled flower bud | T8 (December 1)_bud_1_F | DNA methylation |
| <i>P. deltoides</i> ♀ | Descaled flower bud | T8 (December 1)_bud_2_F | DNA methylation |
| <i>P. deltoides</i> ♀ | Descaled flower bud | T8 (December 1)_bud_3_F | DNA methylation |
| <i>P. deltoides</i> ♀ | Descaled flower bud | T9 (January 15)_bud_1_F | DNA methylation |
| <i>P. deltoides</i> ♀ | Descaled flower bud | T9 (January 15)_bud_2_F | DNA methylation |
| <i>P. deltoides</i> ♀ | Descaled flower bud | T9 (January 15)_bud_3_F | DNA methylation |
| <i>P. deltoides</i> ♂ | Flower bud          | T3 (July 3)_bud_1_M     | DNA methylation |
| <i>P. deltoides</i> ♂ | Flower bud          | T3 (July 3)_bud_2_M     | DNA methylation |
| <i>P. deltoides</i> ♂ | Flower bud          | T3 (July 3)_bud_3_M     | DNA methylation |
| <i>P. deltoides</i> ♂ | Descaled flower bud | T8 (December 1)_bud_1_M | DNA methylation |
| <i>P. deltoides</i> ♂ | Descaled flower bud | T8 (December 1)_bud_2_M | DNA methylation |
| <i>P. deltoides</i> ♂ | Descaled flower bud | T8 (December 1)_bud_3_M | DNA methylation |
| <i>P. deltoides</i> ♂ | Descaled flower bud | T9 (January 15)_bud_1_M | DNA methylation |
| <i>P. deltoides</i> ♂ | Descaled flower bud | T9 (January 15)_bud_2_M | DNA methylation |
| <i>P. deltoides</i> ♂ | Descaled flower bud | T9 (January 15)_bud_3_M | DNA methylation |



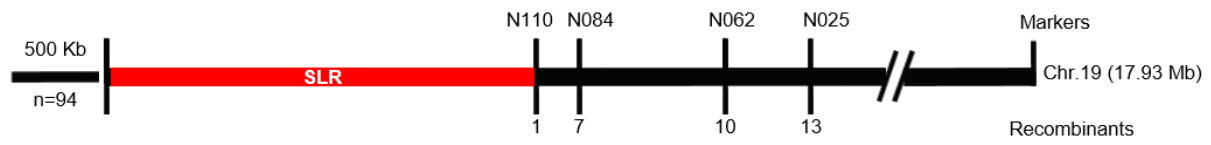

**Supplementary Fig. 1. Initial mapping of sex-linked locus.** A small population of 94 *P. deltoides* individuals was screened using SSR markers.

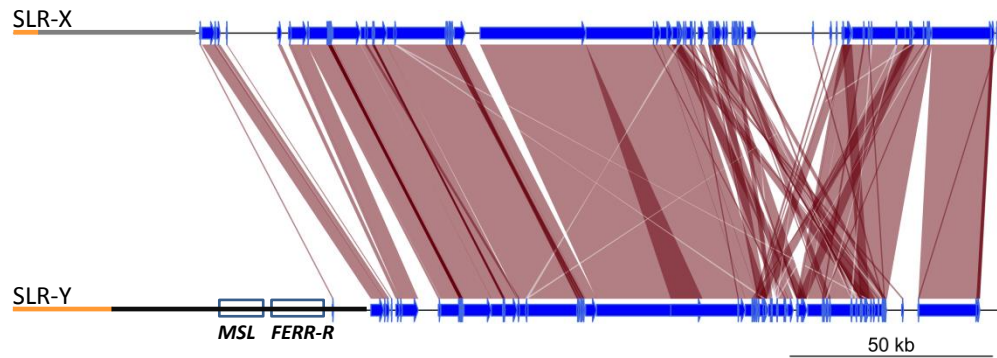

**Supplementary Fig. 2. Alignment of sex-linked regions of the *P. deltooides* X and Y haplotypes.** The orange lines at the left indicate telomere sequences. The blue blocks and arrows indicate sequencing showing similarity between two haplotypes. The red lines connect the regions of sequence similarity in the two haplotypes.

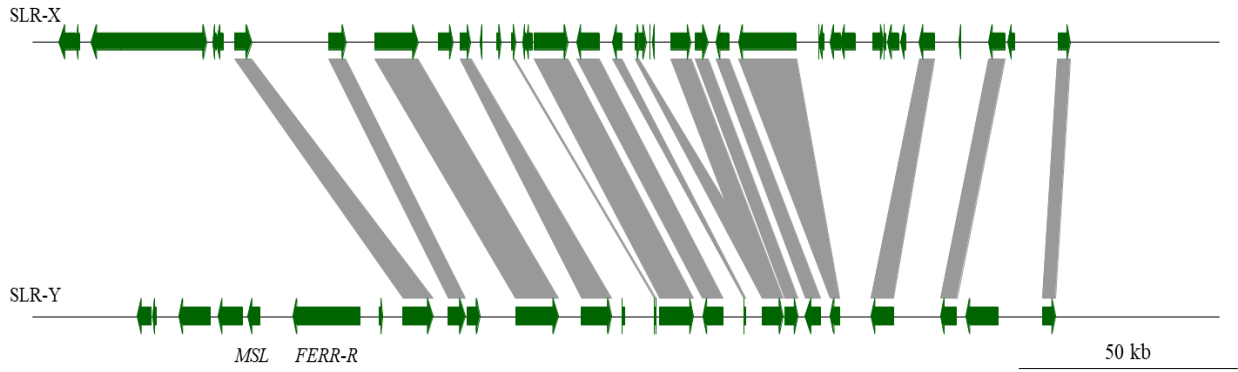

**Supplementary Fig. 3. Synteny plot of the genes in haplotypes X and Y.** Predicted gene models are shown in green arrows. The gray blocks indicate gene pairs between two haplotypes. The plot was generated using genoPlotR.

15

20

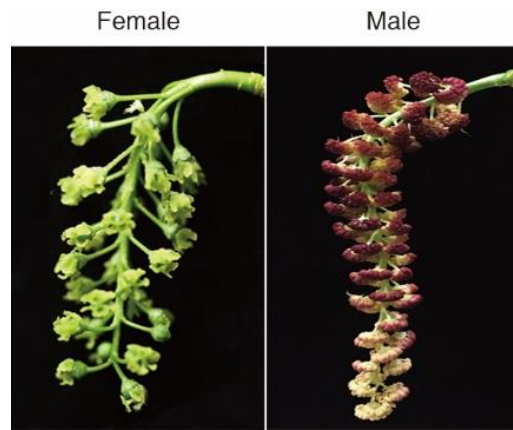

**Supplementary Fig. 4. Female and male flowers of *P. deltoides*.**

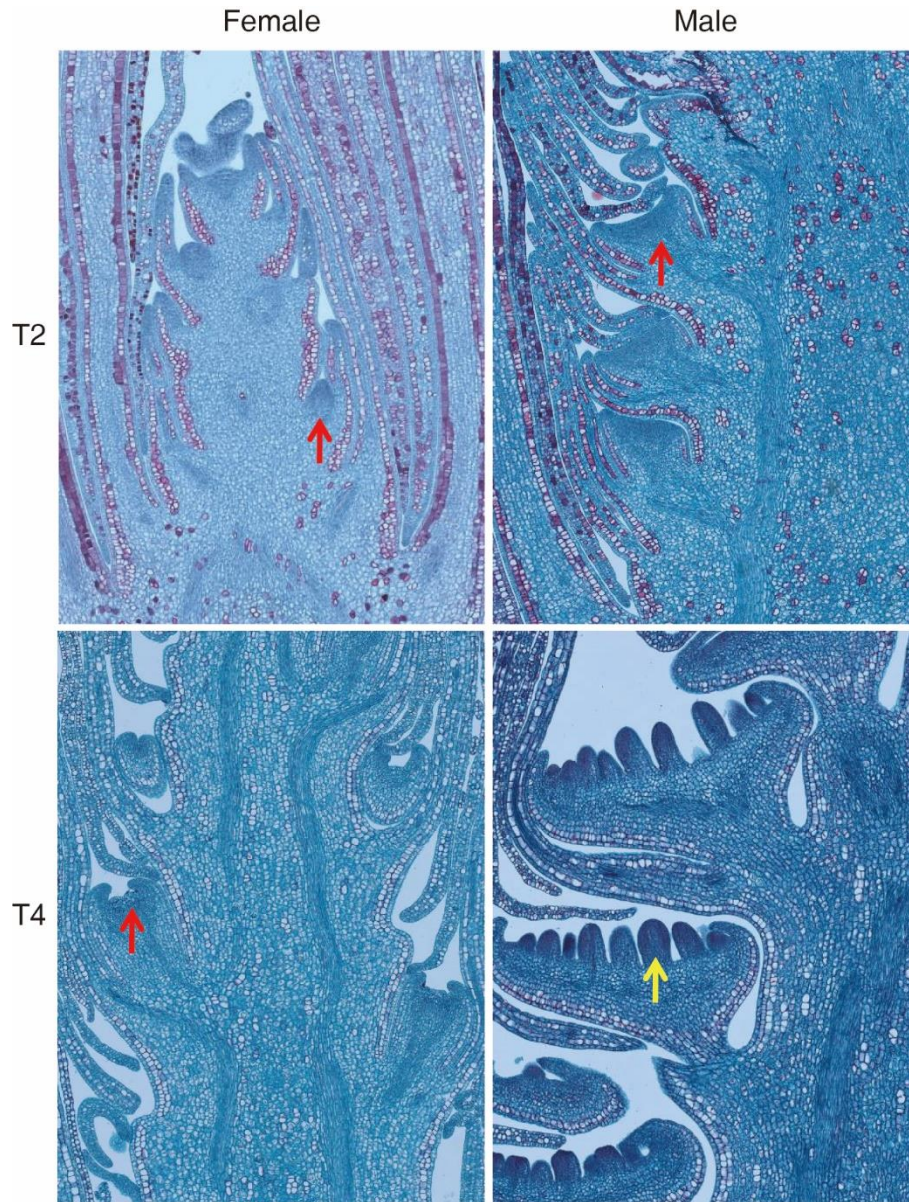

25 **Supplementary Fig. 5. The longitudinal section of the male and female inflorescences at T2 and T4.** T2 and T4 represent June 18 and July 18 respectively. The red arrows point to the florets primordium, whereas the yellow arrow denotes the anther primordium. Three independent samples were observed with similar results.

30

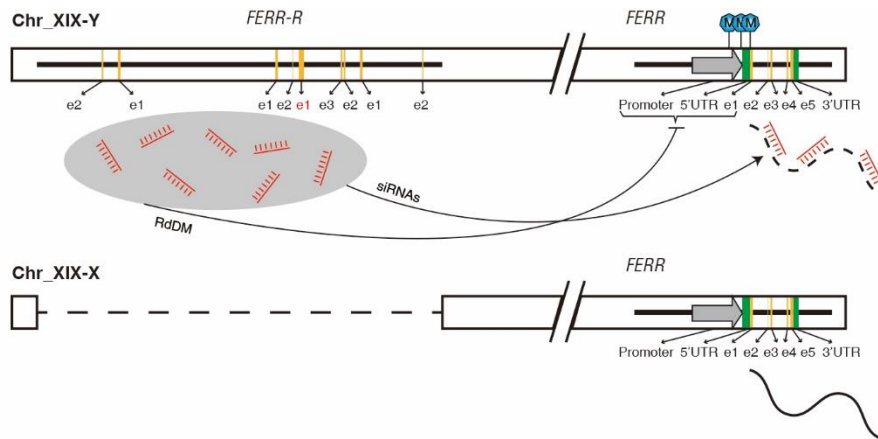

35

**Supplementary Fig. 6. The proposed model for *FERR-R*.** e1-e5 represent exons of the *FERR* gene. RdDM indicates RNA-directed DNA methylation, and 'siRNAs' indicates siRNA-guided mRNA cleavage. XX females do not undergo the cleavage, and female structures develop. XY males express the Y-linked *FERR-R* gene, and undergo the cleavage, suppressing development of female flowers.

40

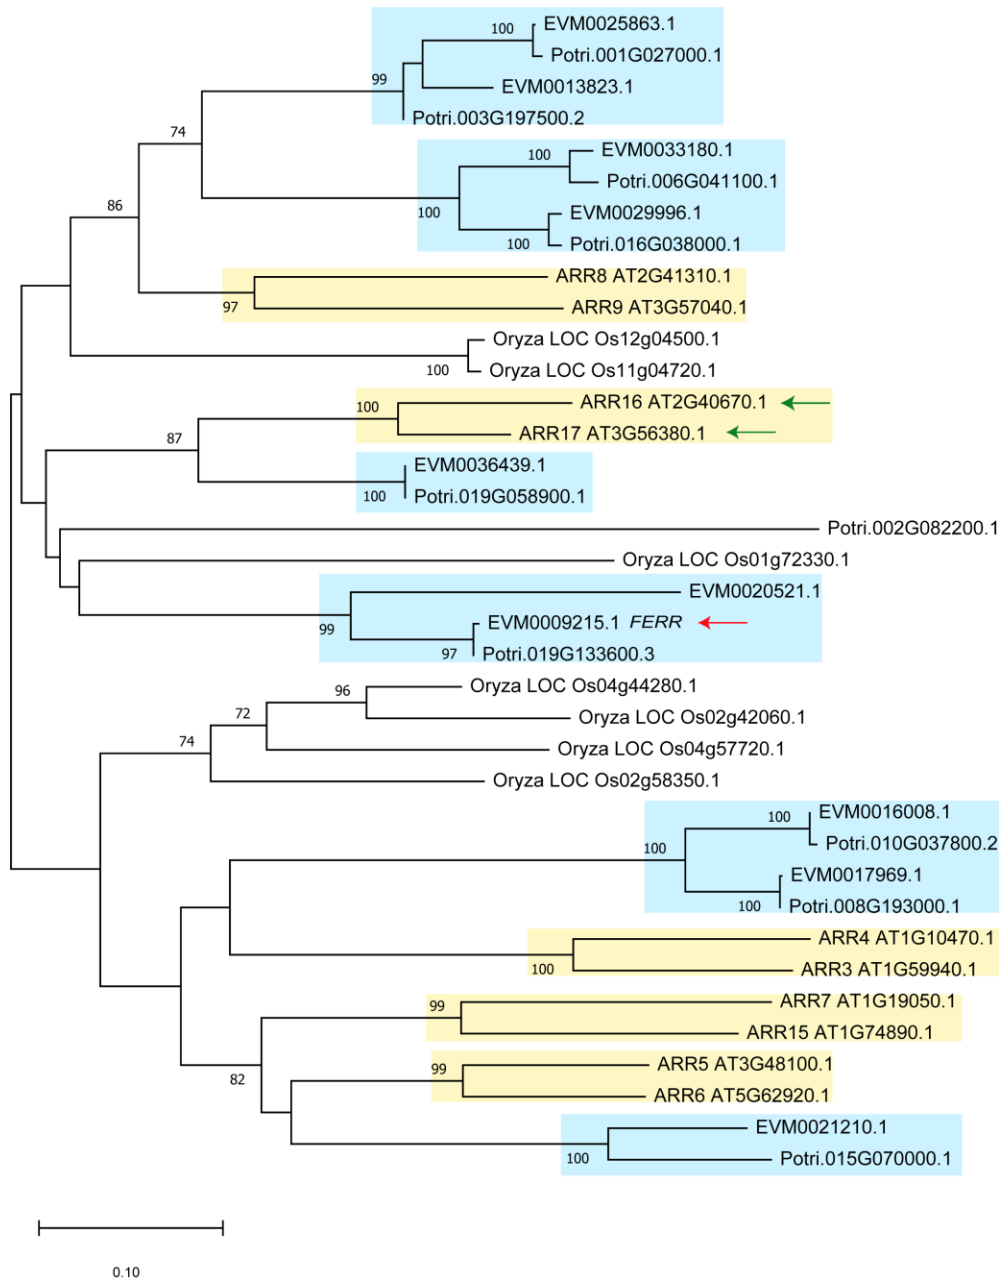

**Supplementary Fig. 7. Phylogenetic analysis of type-A RR genes in several plants.** Protein sequences of type-A RR genes of *P. deltoides* (indicated by names starting with EVM), *P. trichocarpa* (names starting with Potri), *Arabidopsis thaliana* (names starting with ARR), and rice (names starting with *Oryza*) were used to construct the tree. A neighbor-joining tree was constructed using MEGA v. 10.1.7. The numbers by the branches indicate percentages out of 1,000 bootstrap replicates (only percentages higher than 70% are shown). *FERR* is indicated by a red arrow, and *ARR16* and *ARR17* by green arrows. RR genes of poplars and *A. thaliana* are indicated by blue and yellow boxes, respectively.

45

50

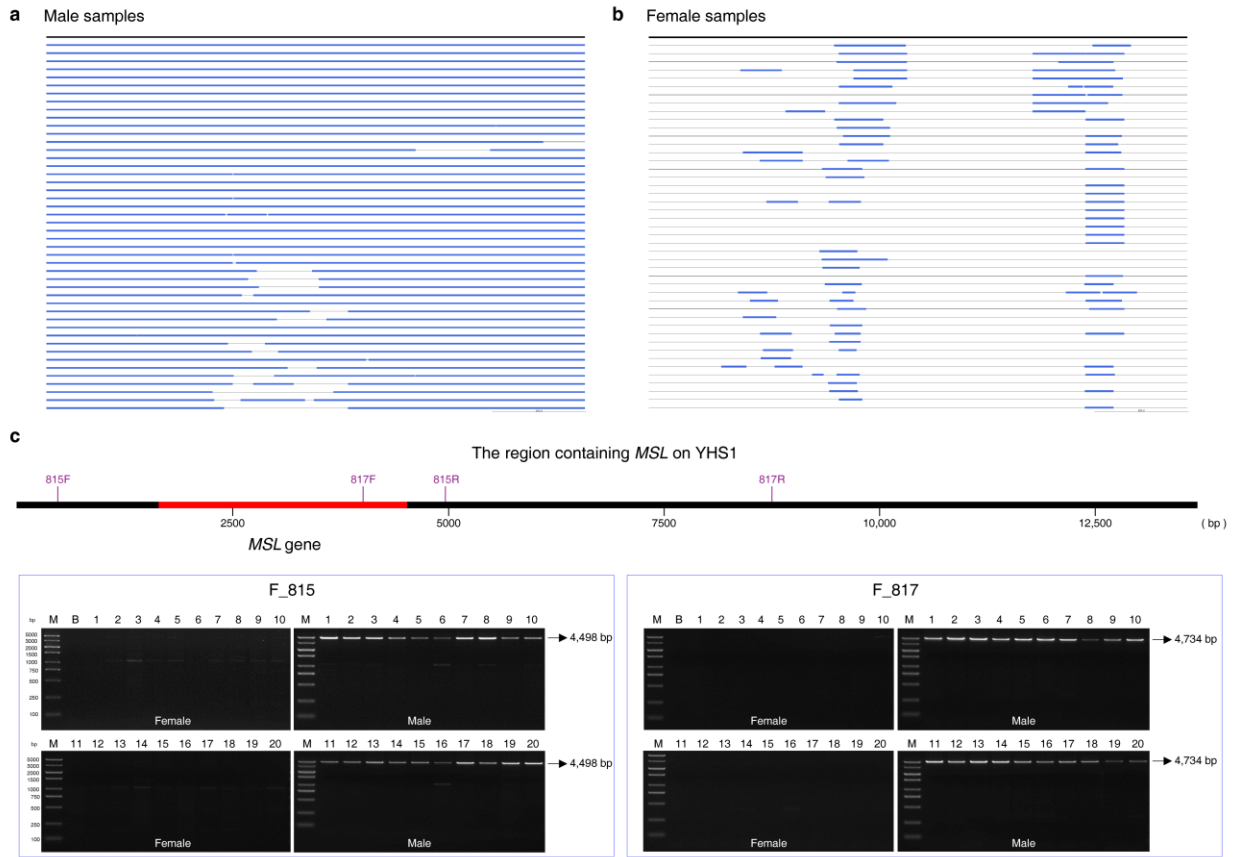

55

**Supplementary Fig. 8. Assemblies of *MSL* sequences for the female and male GWAS samples.** **a** Sequence assembly by raw reads from each of the males; **b** Sequence assembly by raw reads from each of the females. Raw reads matching *MSL* locus were extracted and assembled using Velvet. The derived contigs were aligned against the *MSL* sequence to show the matching positions. **c** Agarose gel electrophoresis profile for fragments F\_815 and F\_817 in females and males. Similar results were obtained in two independent experiments. M, molecular marker. B, blank control. Source data underlying Supplementary Figure 8c are provided as a Source Data file.



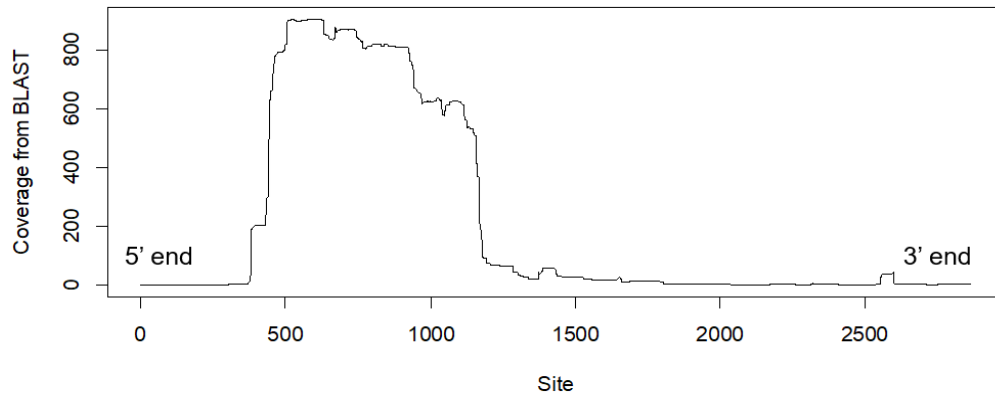

60

**Supplementary Fig. 9. The coverage depths of *MSL* homologues along *MSL* sequence in the male *P. deltoides* genome.** The x-axis shows the positions of the *MSL* sequence from 5' to 3' end. The homologues sequences show homology to *MSL* at the 5' end.

65

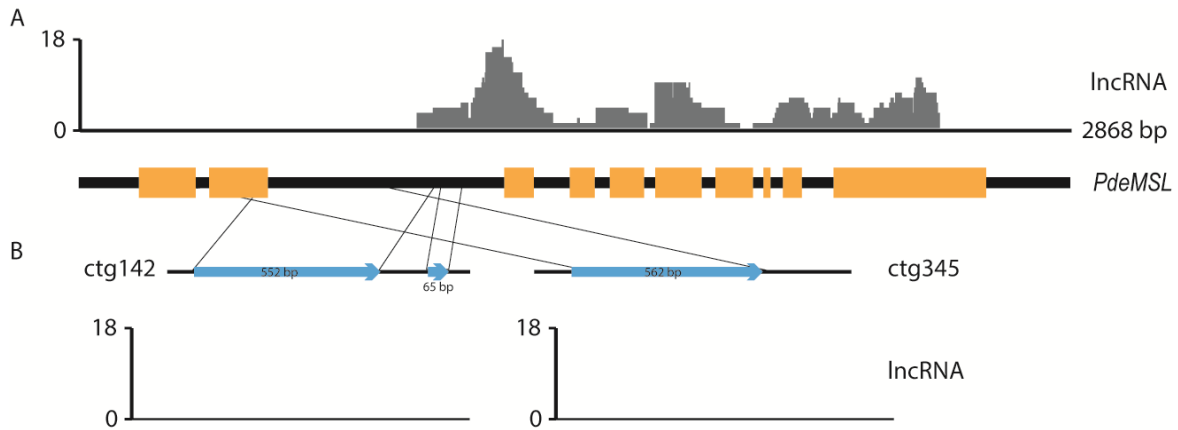

**Supplementary Fig. 10. Transcription of *PdeMSL* in *P. deltooides* and transcription of the *PdeMSL* homologous segments in *P. davidiana*.** **a** Gene structure and transcription of *PdeMSL*. The yellow boxes indicate predicted *PdeMSL* exons. The upper track visualizes the abundance of lncRNA. **b** Transcription of *PdeMSL* homologous segments in ctg345 and ctg142 in *P. davidiana*. Ctg345 resides at pericentromeric region, while ctg142 resides at peritelomeric region on chromosome 19 in genome of *P. davidiana*. The blue segments represent the *PdeMSL* homologous sequences in ctg142 and ctg345.

70

75

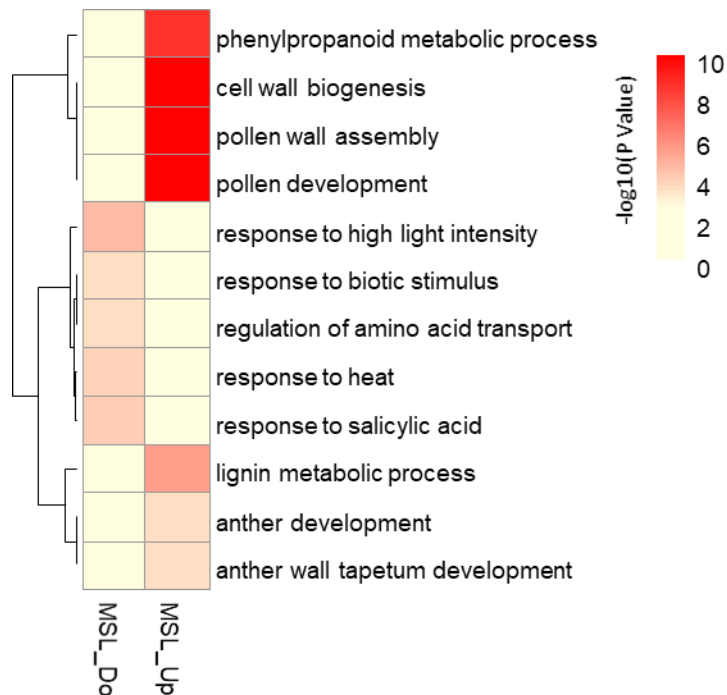

**Supplementary Fig. 11. Gene ontology enrichment analysis of differentially expressed genes in transgenic Arabidopsis overexpressing MSL.** P values were  $-\log_{10}$  transformed and visualized using a heat map. Gene annotations were downloaded from TAIR (<https://www.arabidopsis.org>). Significantly over-represented GO terms of Biological Process category were shown in the plot.

80

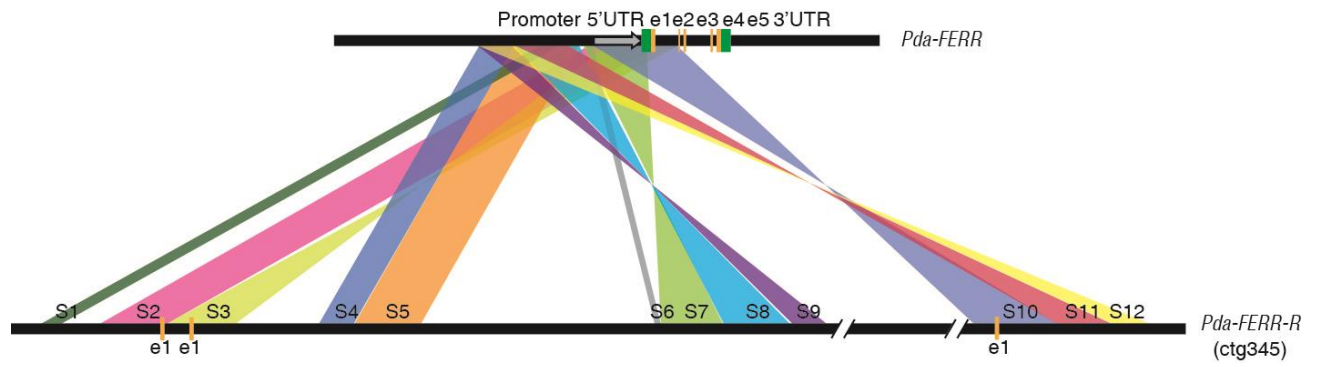

85 **Supplementary Fig. 12. Origination of *FERR-R* in *P. davidiana*.** e1-e5 represent exons of *FERR* in *P. davidiana*. S1-S12 represent the duplicated segments between *FERR-R* and *FERR* in *P. davidiana*.

## Supplementary References

90

1. Murray, M. & Thompson, W. F. Rapid isolation of high molecular weight plant DNA. *Nucleic Acids Res.* **8**, 4321-4326 (1980).

2. Ruan, J. & Li, H. Fast and accurate long-read assembly with wtdbg2. *Nat. Methods* **17**, 155-158(2020).

95

3. Chin, C.-S. *et al.* Phased diploid genome assembly with single-molecule real-time sequencing. *Nat. Methods* **13**, 1050 (2016).

4. Koren, S., Walenz, B. P., Berlin, K., Miller, J. R. & Phillippy, A. M. Canu: scalable and accurate long-read assembly via adaptive *k*-mer weighting and repeat separation. *Genome Res.* **27**, 722-736 (2017).

100

5. Chakraborty, M., Baldwin-Brown, J.G., Long, A.D. & Emerson, J.J. Contiguous and accurate de novo assembly of metazoan genomes with modest long read coverage. *Nucleic Acids Res* **44**, e147-e147 (2016).

6. Walker, B. J. *et al.* Pilon: an integrated tool for comprehensive microbial variant detection and genome assembly improvement. *PLoS ONE* **9** (2014).

105

7. Servant, N. *et al.* HiC-Pro: an optimized and flexible pipeline for Hi-C data processing. *Genome Biol.* **16**, 259-259 (2015).

8. Burton, J. N. *et al.* Chromosome-scale scaffolding of *de novo* genome assemblies based on chromatin interactions. *Nat. Biotechnol.* **31**, 1119-1125 (2013).

9. Simão, F. A., Waterhouse, R. M., Ioannidis, P., Kriventseva, E. V. & Zdobnov, E. M. BUSCO: assessing genome assembly and annotation completeness with single-copy orthologs. *Bioinformatics* **31**, 3210-3212 (2015).

110

10. Ou, S. & Jiang, N. LTR\_retriever: a highly accurate and sensitive program for identification of long terminal repeat retrotransposons. *Plant Physiol.* **176**, 1410–1422 (2018).

11. Price, A. L., Jones, N. C. & Pevzner, P. A. *De novo* identification of repeat families in large

115

genomes. *Bioinformatics* **21**, i351-i358 (2005).

12. Edgar, R. C. & Myers, E. W. PILER: identification and classification of genomic repeats. *Bioinformatics* **21**, i152-i158 (2005).

13. Hoede, C. *et al.* PASTEC: an automatic transposable element classification tool. *PloS one* **9**, e91929 (2014).

120

14. Bao, W., Kojima, K. K. & Kohany, O. Repbase Update, a database of repetitive elements in

eukaryotic genomes. *Mob. DNA* **6**, 11 (2015).

15. Smit, A., Hubley, R. & Green, P. RepeatMasker Open-3.0. (1996).
16. Kim, D., Langmead, B. & Salzberg, S. L. HISAT: a fast spliced aligner with low memory requirements. *Nat. Methods* **12**, 357-360 (2015).
- 125 17. Pertea, M. *et al.* StringTie enables improved reconstruction of a transcriptome from RNASeq reads. *Nat. Biotechnol.* **33**, 290-295 (2015).
18. Haas, B. J. *et al.* De novo transcript sequence reconstruction from RNASeq using the Trinity platform for reference generation and analysis. *Nat. Protoc.* **8**, 1494 (2013).
19. Besemer, J., Lomsadze, A. & Borodovsky, M. GeneMarkS: a self-training method for  
130 prediction of gene starts in microbial genomes. Implications for finding sequence motifs in regulatory regions. *Nucleic Acids Res.* **29**, 2607-2618 (2001).
20. Haas, B. J. *et al.* Improving the *Arabidopsis* genome annotation using maximal transcript alignment assemblies. *Nucleic Acids Res.* **31**, 5654-5666 (2003).
21. Burge, C. B. & Karlin, S. Prediction of complete gene structures in human genomic DNA. *J.*  
135 *Mol. Biol.* **268**, 78-94 (1997).
22. Stanke, M., Schoffmann, O., Morgenstern, B. & Waack, S. Gene prediction in eukaryotes with a generalized hidden Markov model that uses hints from external sources. *BMC Bioinformatics* **7**, 62 (2006).
23. Korf, I. F. Gene finding in novel genomes. *BMC Bioinformatics* **5**, 59 (2004).
- 140 24. Keilwagen, J., Hartung, F., Paulini, M., Twardziok, S. O. & Grau, J. Combining RNASeq data and homology-based gene prediction for plants, animals and fungi. *BMC Bioinformatics* **19**, 189 (2018).
25. Allen, J. E., Pertea, M. & Salzberg, S. L. Computational gene prediction using multiple sources of evidence. *Genome Res.* **14**, 142-148 (2003).
- 145 26. Nawrocki, E. P., Kolbe, D. L. & Eddy, S. R. Infernal 1.0: inference of RNA alignments. *Bioinformatics* **25**, 1335-1337 (2009).
27. Lowe, T. M. & Eddy, S. R. tRNAscan-SE: a program for improved detection of transfer RNA genes in genomic sequence. *Nucleic Acids Res.* **25**, 955-964 (1997).
28. Birney, E., Clamp, M. & Durbin, R. GeneWise and Genomewise. *Genome Res.* **14**, 988-995  
150 (2004).
29. She, R., Chu, S. C., Wang, K., Pei, J. & Chen, N. GenBlastA: enabling BLAST to identify

homologous gene sequences. *Genome Res.* **19**, 143-149 (2008).

30. Roach, M. J., Schmidt, S. A. & Borneman, A. R. Purge Haplotigs: allelic contig reassignment for third-gen diploid genome assemblies. *BMC Bioinformatics* **19**, 460(2018).
- 155 31. Bolger, A. M., Lohse, M. & Usadel, B. Trimmomatic: a flexible trimmer for Illumina sequence data. *Bioinformatics* **30**, 2114-2120 (2014).
32. Dobin, A. *et al.* STAR: ultrafast universal RNASeq aligner. *Bioinformatics* **29**, 15-21 (2013).
33. Anders, S. & Huber, W. Differential expression analysis for sequence count data. *Genome Boil.* **11**, 1-12 (2010).
- 160 34. Langmead, B. & Salzberg, S.L. Fast gapped-read alignment with Bowtie 2. *Nature Methods* **9**, 357-359 (2012).
35. Krueger, F. & Andrews, S. Bismark: a flexible aligner and methylation caller for Bisulfite-Seq applications. *Bioinformatics* **27**, 1571-1572 (2011).
36. Robinson JT, Thorvaldsdottir H, Wenger AM, Zehir A, Mesirov JP. Variant review with the Integrative Genomics Viewer. *Cancer Research* **77**, (2017).
- 165 37. Zerbino, D. R. & Birney, E. Velvet: Algorithms for de novo short read assembly using de Bruijn graphs. *Genome Res.* **18**(5): 821-829(2008).
38. Guy, L., Kultima, J.R. & Andersson, S.G.E. genoPlotR: comparative gene and genome visualization in R. *Bioinformatics* **26**, 2334-2335 (2010).

170
