# Supplementary material for: Evidences for a role of two Y-specific genes in sex determination in Populus deltoides
Source: PubMed Central journal article supplement (PMC7674411; doi:10.1038/s41467-020-19559-2), 2020-11-18
Supplement: 41467_2020_19559_MOESM4_ESM.pdf [file 41467_2020_19559_MOESM4_ESM.pdf]

## **Description of Additional Supplementary Files**

Supplementary Data 1

Gene expression data from *A. thaliana* over-expressing *FERR*.

Supplementary Data 2

*MSL* homology regions in *Populus* and *Salix* species

Supplementary Data 3

Gene expression data from *A. thaliana* over-expressing *MSL*.
